# Supplementary material for: Neferine ameliorates cardiomyoblast apoptosis induced by doxorubicin: possible role in modulating NADPH oxidase/ROS-mediated NFκB redox signaling cascade
Source: PubMed Central journal article supplement (PMC5612945; doi:10.1038/s41598-017-12060-9), 2017-09-25
Supplement: 41598_2017_12060_MOESM1_ESM.pdf [file 41598_2017_12060_MOESM1_ESM.pdf]

**Neferine ameliorates cardiomyoblast apoptosis induced by doxorubicin:  
possible role in modulating NADPH oxidase/ROS-mediated NFκB redox  
signaling cascade**

**Lohanathan Bharathi Priya<sup>1</sup>, Rathinasamy Baskaran<sup>2</sup>, Chih-Yang Huang<sup>3,4,5</sup>,  
Viswanadha Vijaya Padma<sup>1,3,5,\*</sup>**

## Supplementary Data S1: Uncropped western blots

1D

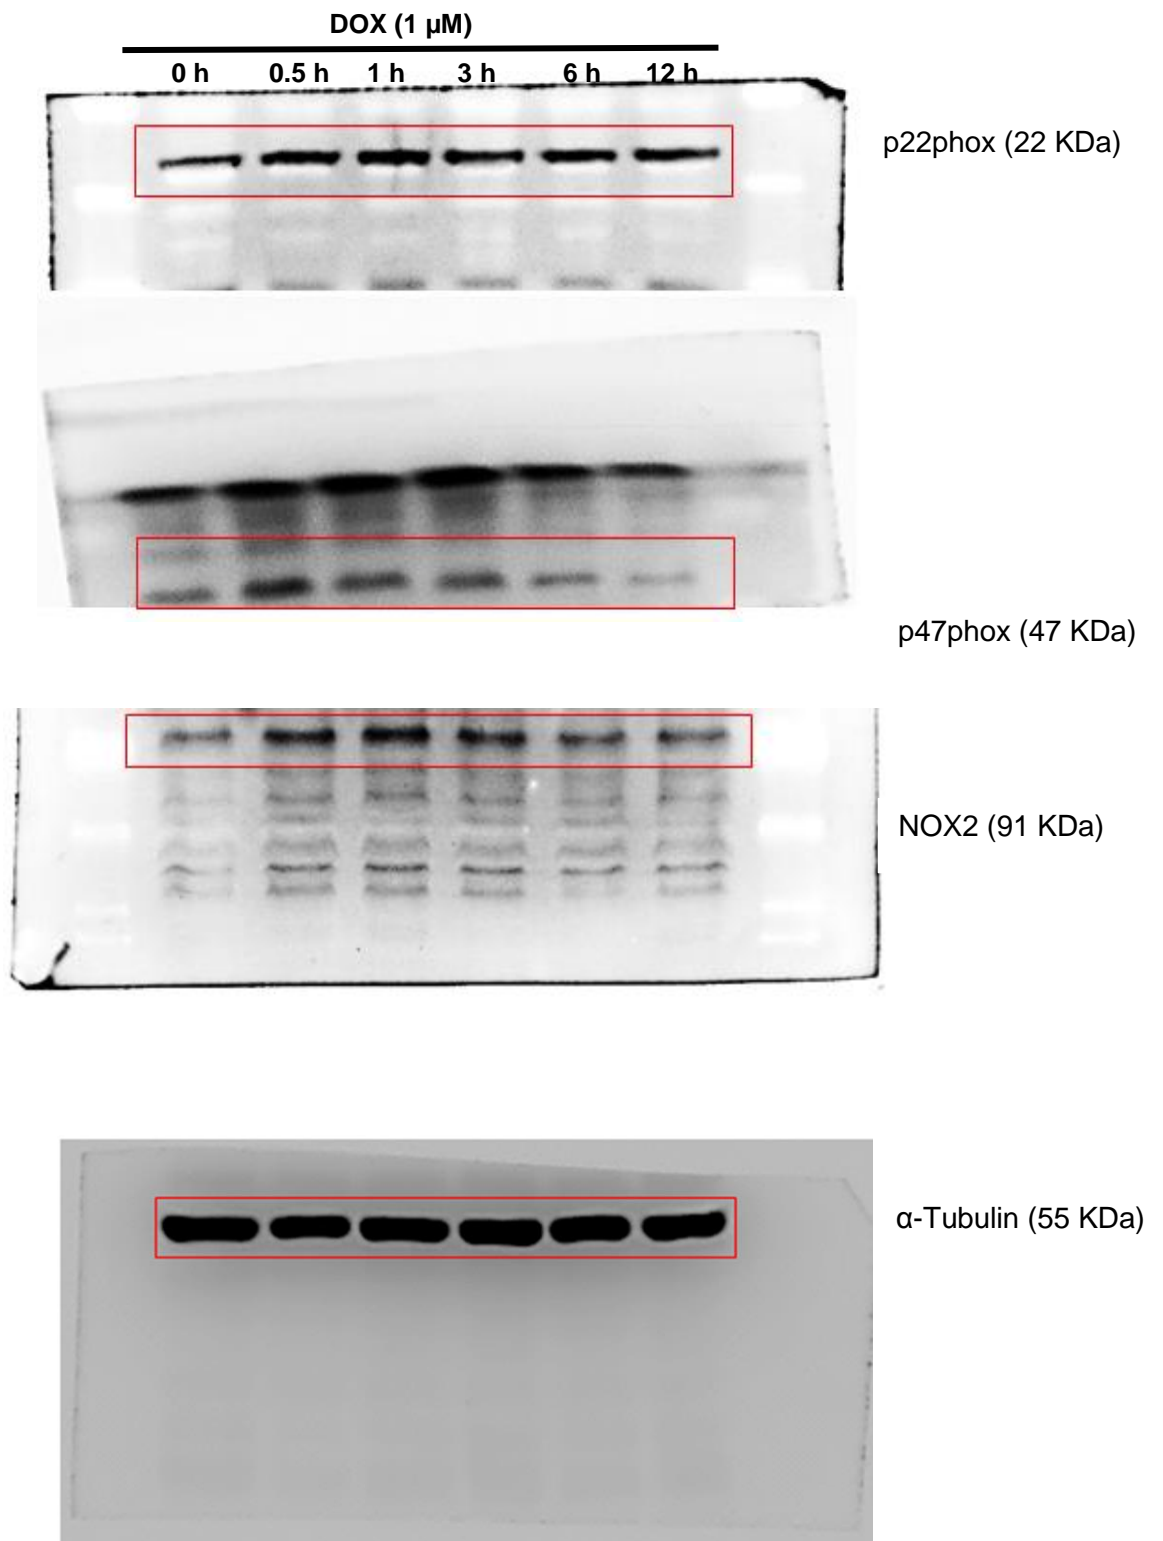

1E

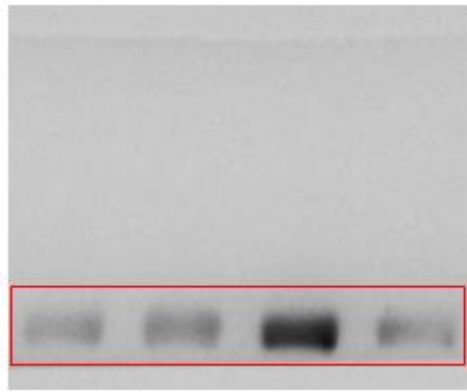

p22phox (22 KDa)

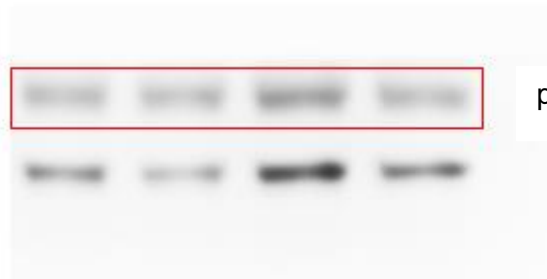

p47phox (47 KDa)

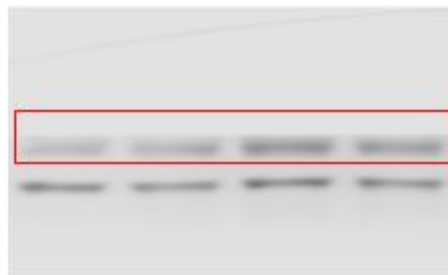

NOX2 (91 KDa)

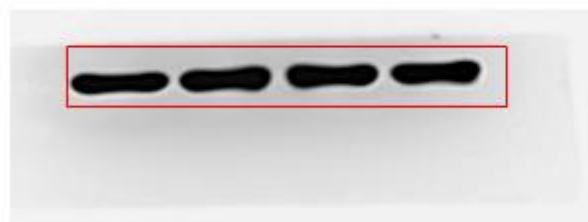

$\alpha$ -Tubulin (55 KDa)

|                                        |   |   |   |   |
|----------------------------------------|---|---|---|---|
| <b>DOX (1 <math>\mu</math>M)</b>       | - | - | + | + |
| <b>Neferine (10 <math>\mu</math>M)</b> | - | + | - | + |

2D

DOX (1  $\mu$ M)

0 h      1 h      3 h      6 h      12 h      24 h

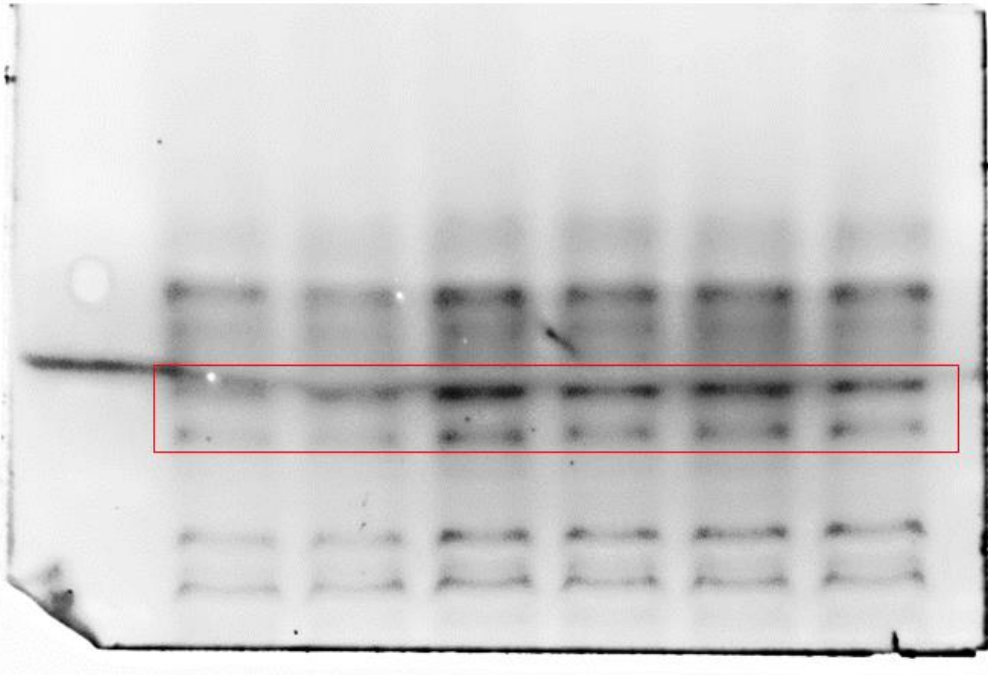

p-ERK1/2 (44/42 KDa)

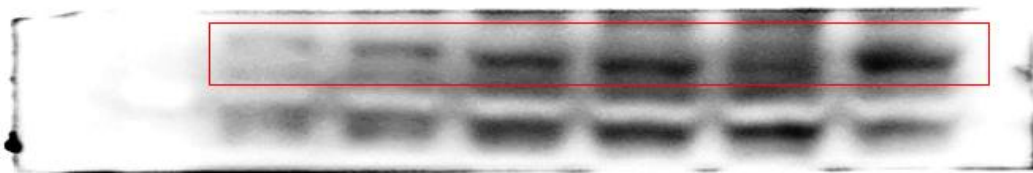

p-p38 (38 KDa)

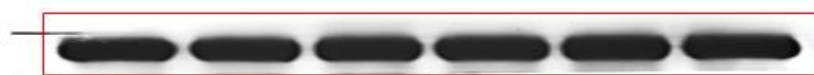

$\beta$ -Actin (43 KDa)

2E

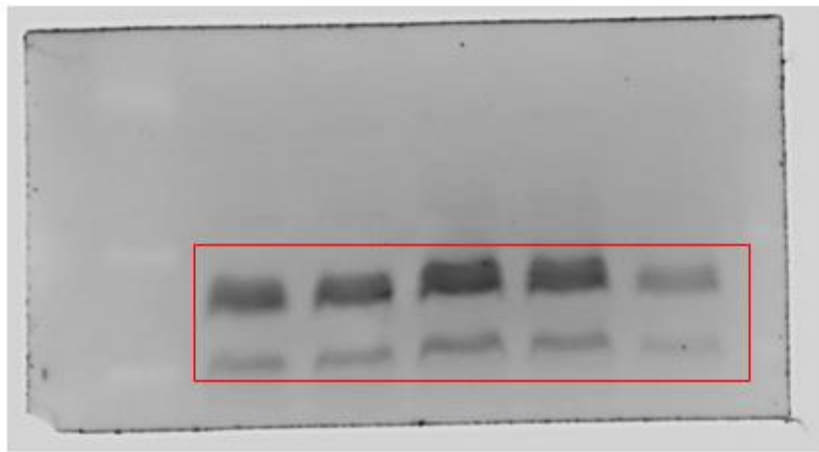

p-ERK1/2 (44/42 KDa)

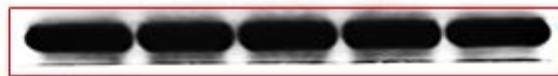

β-Actin (43 KDa)

U0126

- - - - +

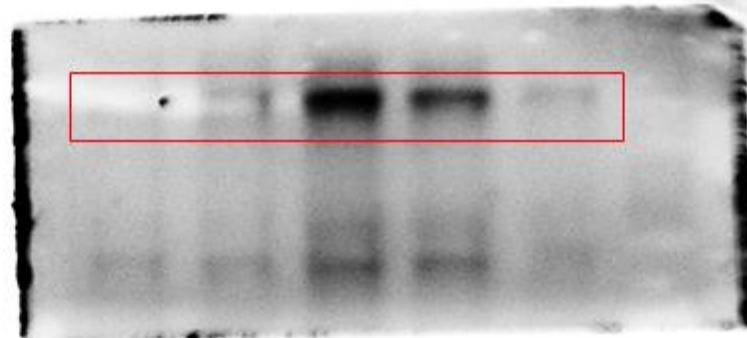

p-p38 (38 KDa)

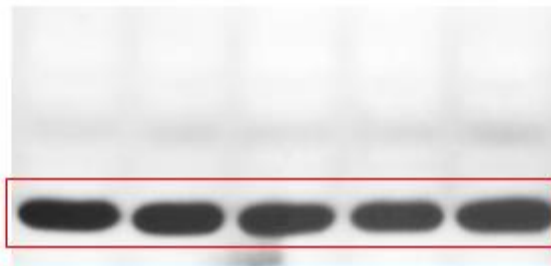

β-Actin (43 KDa)

B203580 - - - - +

DOX (1 μM) - - + + +

Neferine (10 μM) - + - + -

3A

DOX (1  $\mu$ M)

0 h 1 h 3 h 6 h 12 h 24 h

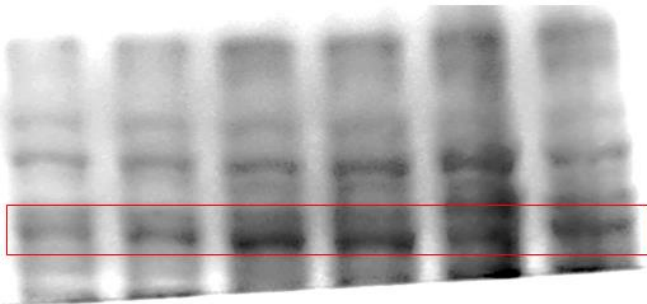

NFkB p65 (65 KDa)

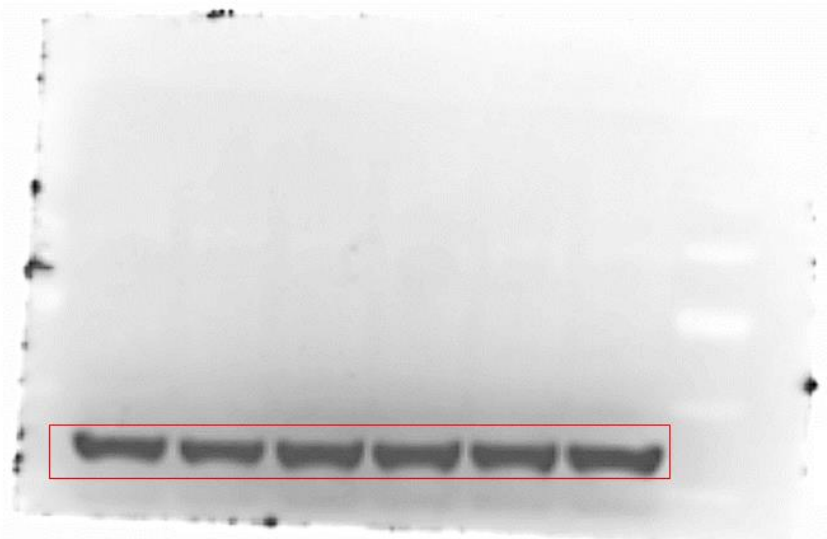

HDAC1 (72 KDa)

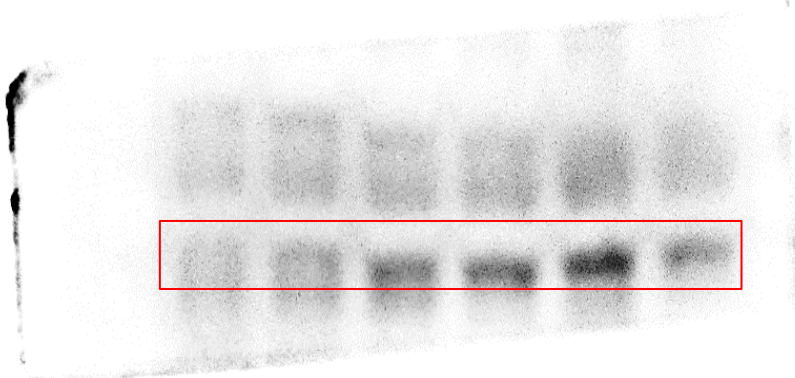

COX2 (74 KDa)

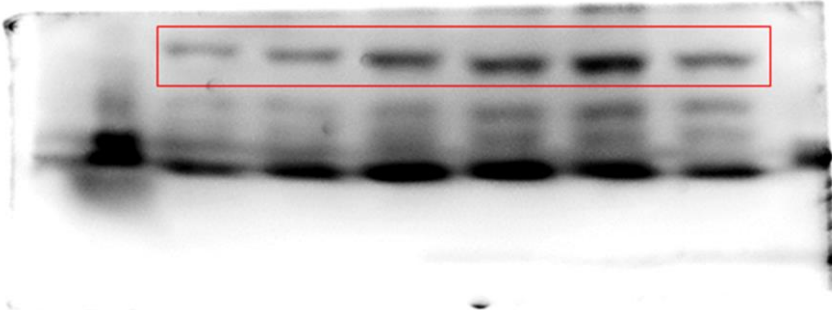

TNF- $\alpha$  (17 KDa)

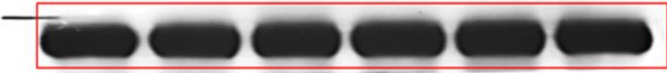

$\beta$ -Actin (43 KDa)

3B

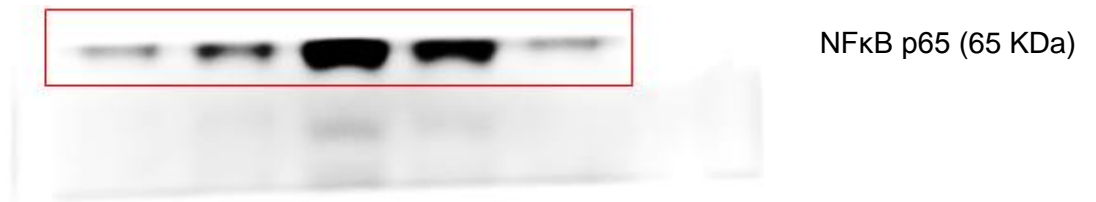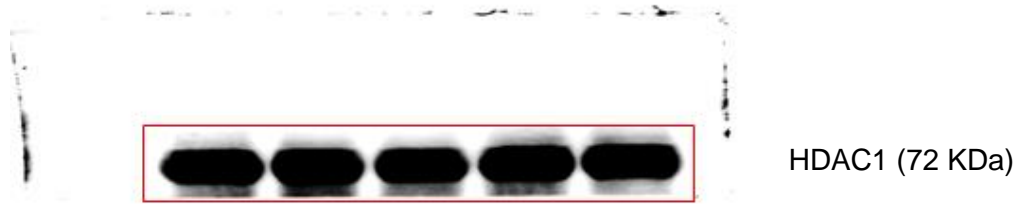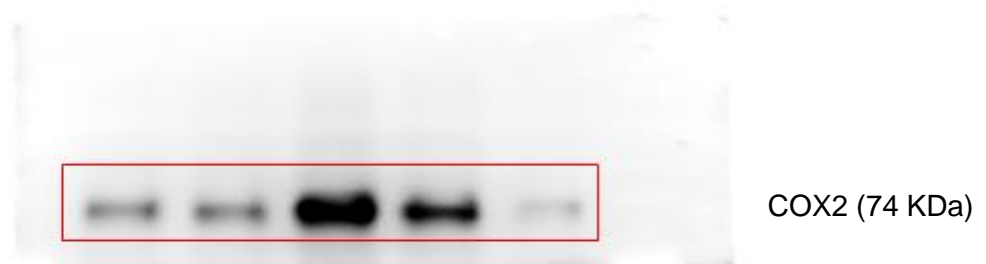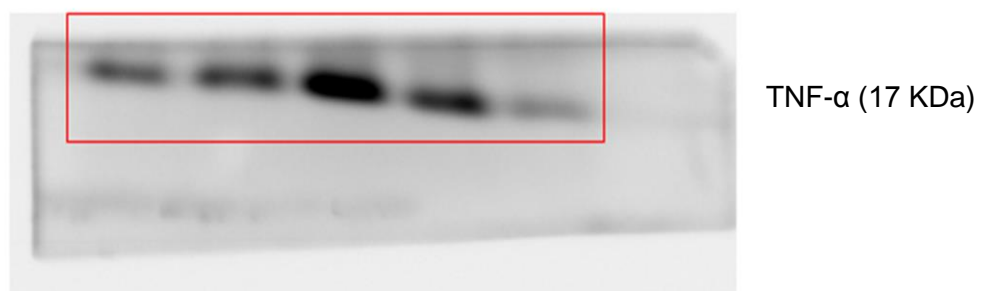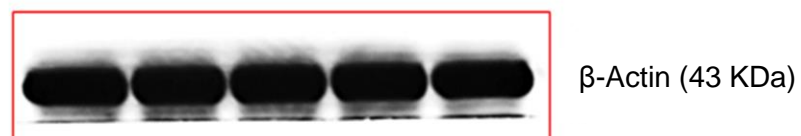

|                         |   |   |   |   |   |
|-------------------------|---|---|---|---|---|
| <b>DOX (1 μM)</b>       | - | - | + | + | + |
| <b>Neferine (10 μM)</b> | - | + | - | + | - |
| <b>QNZ (200 nM)</b>     | - | - | - | - | + |

5D

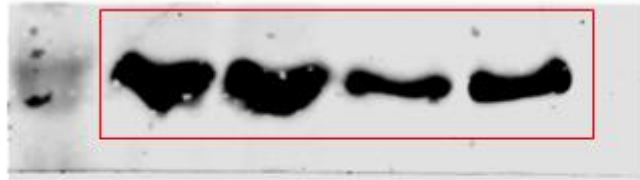

Cyclin D1 (37 KDa)

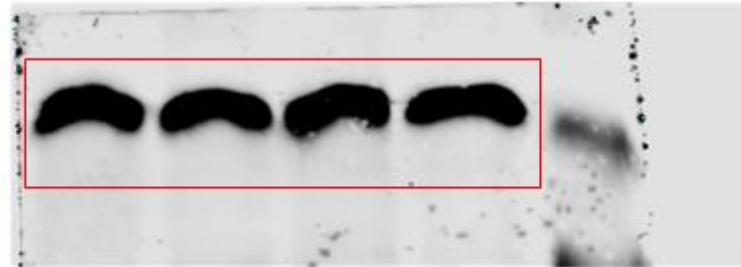

$\beta$ -Actin (43 KDa)

|                                  |   |   |   |   |
|----------------------------------|---|---|---|---|
| <b>DOX (1 <math>\mu</math>M)</b> | - | - | + | + |
| <b>Neferine</b>                  | - | + | - | + |



6C

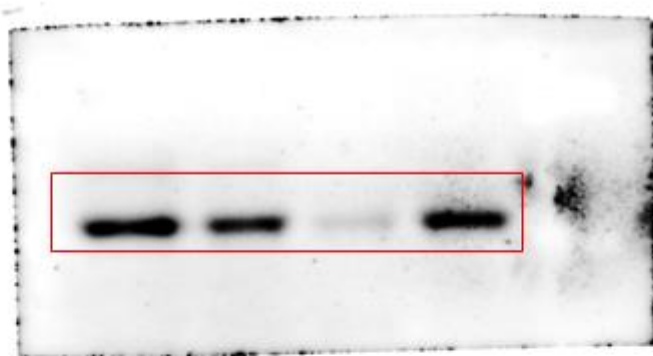

Bcl-2 (26 KDa)

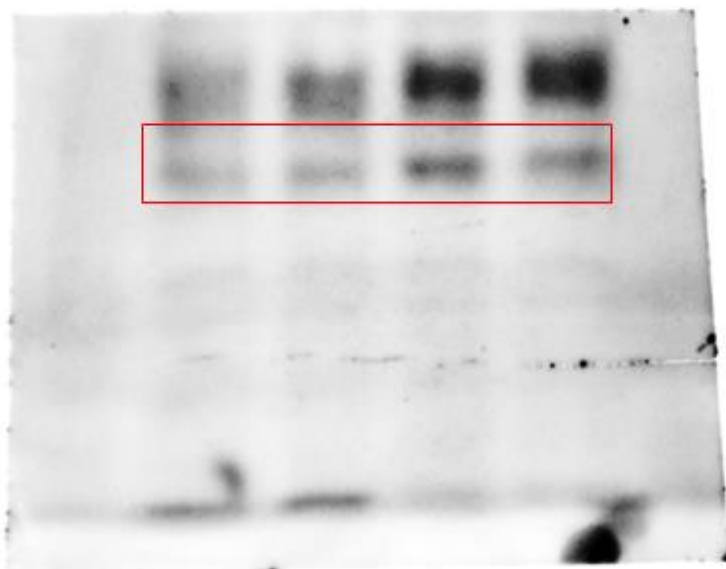

Bax (23 KDa)

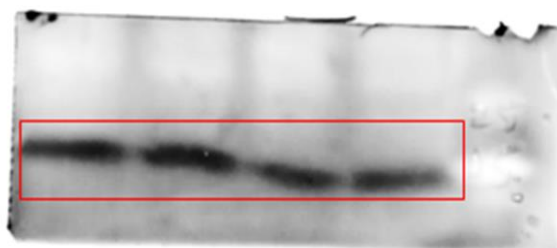

p-Bad (25 KDa)

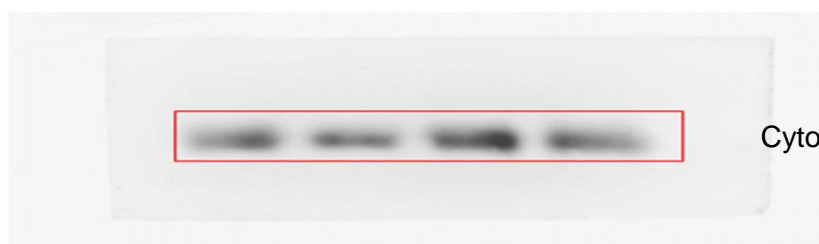

Cytochrome C (15 KDa)

|                                        |   |   |   |   |
|----------------------------------------|---|---|---|---|
| <b>DOX (1 <math>\mu</math>M)</b>       | - | - | + | + |
| <b>Neferine (10 <math>\mu</math>M)</b> | - | + | - | + |

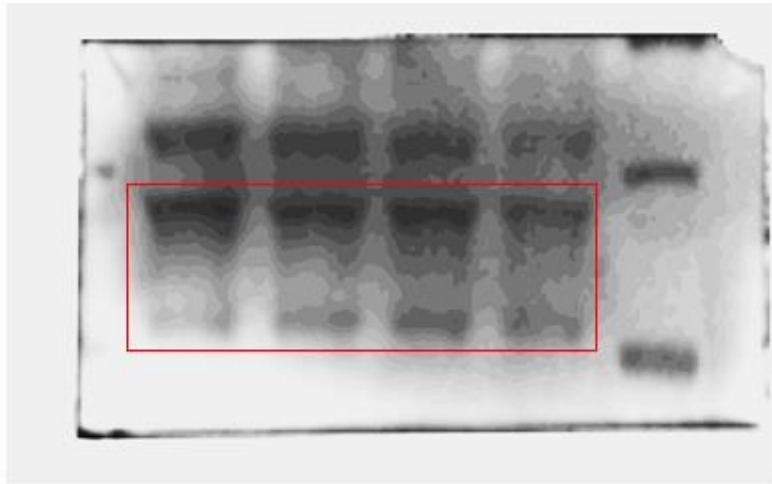

Cleaved caspase-9 (38/17 KDa)

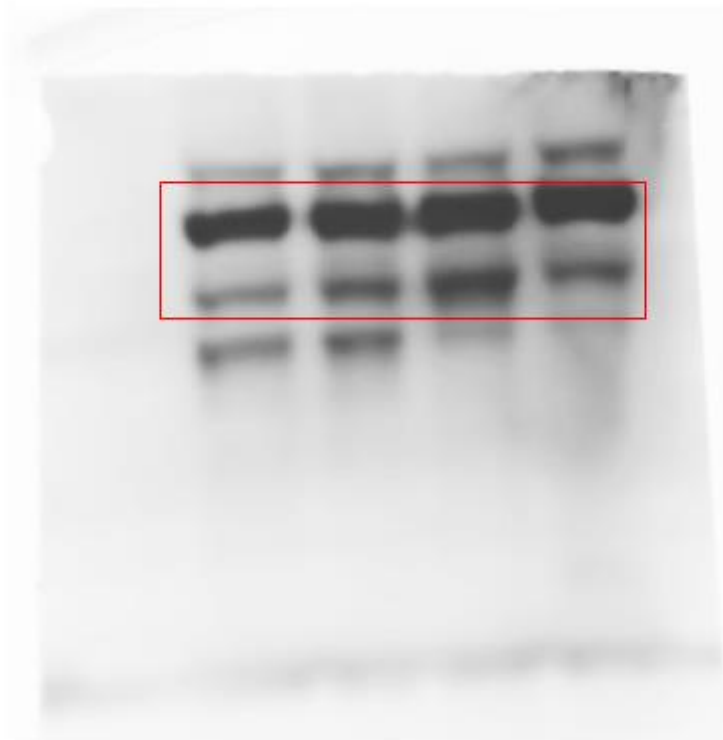

Cleaved caspase-3 (19/17 KDa)

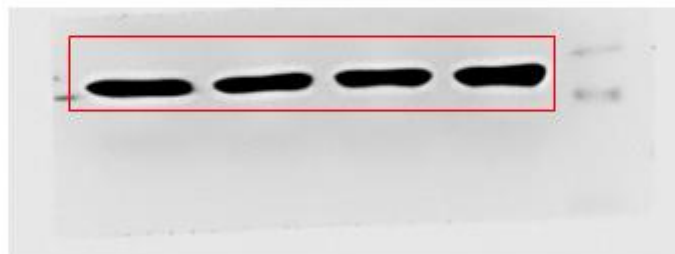

$\beta$ -Actin (43 KDa)

|                                        |   |   |   |   |
|----------------------------------------|---|---|---|---|
| <b>DOX (1 <math>\mu</math>M)</b>       | - | - | + | + |
| <b>Neferine (10 <math>\mu</math>M)</b> | - | + | - | + |
